# Supplementary material for: SGK1 Governs the Reciprocal Development of Th17 and Regulatory T Cells
Source: PubMed Central journal article supplement — Cell Rep. Author manuscript; Available in PMC 2018 Feb 26. (PMC5826610; doi:10.1016/j.celrep.2017.12.068), 2018-01-16
Supplement: NIHMS937387-supplement-1.pdf [file NIHMS937387-supplement-1.pdf]

**Cell Reports, Volume 22**

**Supplemental Information**

**SGK1 Governs the Reciprocal**

**Development of Th17 and Regulatory T Cells**

**Chuan Wu, Zuojia Chen, Sheng Xiao, Theresa Thalhamer, Asaf Madi, Timothy Han, and Vijay Kuchroo**

## Supplemental Figures

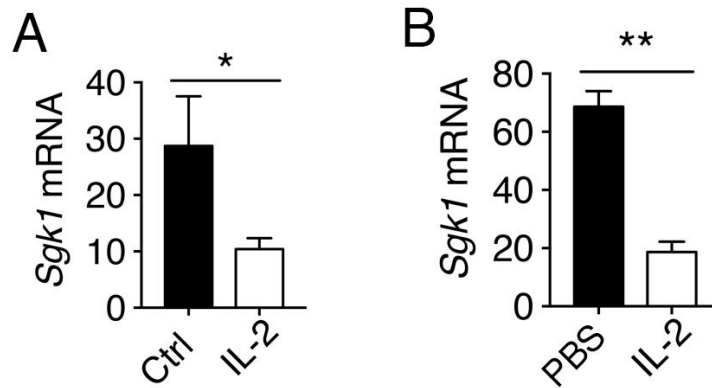

**Figure S1. *Sgk1* expression was reduced under IL-2 treatment. Related to Figure 1.** (A) tTreg cells were in vitro stimulated with or without IL-2 for 3 days. *Sgk1* mRNA expression level was determined by q-PCR. (B) WT mice were intraperitoneally injected with PBS or IL-2-anti-IL-2 complex for 3 days. tTreg cells were isolated from different groups and *Sgk1* mRNA expression level was determined by q-PCR. Data are representative of three independent experiments. Error bars represent SEM. \* $P < 0.05$ , \*\* $P < 0.01$  (Student's t-test, error bars, SD).

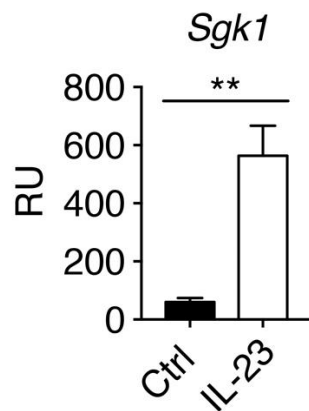

**Figure S2. *Sgk1* expression was upregulated in  $\gamma\delta$  T cells after IL-23 treatment. Related to Figure 4.** SGK1 expression level in  $\gamma\delta$  T cells from intraepithelial lymphocytes with or without IL-23 stimulation was determined by qPCR. Data are representative of three independent experiments. Error bars represent SEM. \*\*P < 0.01 (Student's t-test, error bars, SD)

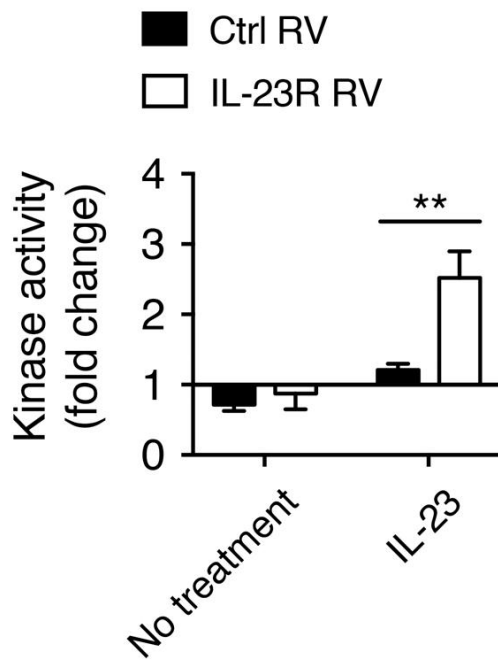

**Figure S3. IL-23R enhanced the kinase activity of SGK1. Related to Figure 4.** Naive WT T cells were transduced with retrovirus expressing control vector (Ctrl RV) or IL-23R-expressing vector (IL-23R RV) and stimulated with or without IL-23 in the presence of anti-CD3/28. SGK1 kinase activity was measured in different groups. Data are representative of three independent experiments. Error bars represent SEM. \*\*P < 0.01 (Student's t-test, error bars, SD)

## **Supplemental Experimental Procedures**

### **SGK1 Kinase activity assay**

Cell lysates were prepared as described above and SGK1 was immunoprecipitated from the lysates with anti-SGK1 (Abcam, ab43606). The immunoprecipitate was washed extensively and SGK1 kinase activity was assessed with a luminescence-based assay (SGK1 kinase ADP-Glo™ Kinase Assay, Promega).
